# Supplementary material for: Design, synthesis, and characterization of lightly sulfonated multigraft acrylate-based copolymer superelastomers
Source: Royal Society of Chemistry journal article supplement (doi:10.1039/c7ra08641e), 2018-01-01
Supplement: c7ra08641e1.pdf [file c7ra08641e1.pdf]

# Design, Synthesis, and Characterization of Lightly Sulfonated Multigraft Acrylate-based Copolymer Superelastomers

Konstantinos Misichronis<sup>a,b</sup>, Weiyu Wang<sup>c</sup>, Shiwang Cheng<sup>b</sup>, Yangyang Wang<sup>c</sup>, Umesh Shrestha<sup>a</sup>, Mark Dadmun<sup>a</sup>, Jimmy W. Mays<sup>a</sup>, Tomonori Saito<sup>b,\*</sup>

<sup>a</sup>Department of Chemistry, University of Tennessee, Knoxville, TN, 37996, USA

<sup>b</sup>Chemical Sciences Division, Oak Ridge National Laboratory, Oak Ridge, TN, 37831, USA

<sup>c</sup>Center for Nanophase Materials Sciences, Oak Ridge National Laboratory, Oak Ridge, TN, 37831, USA

*This manuscript has been authored by UT-Battelle, LLC under Contract No. DE-AC05-00OR22725 with the U.S. Department of Energy. The United States Government retains and the publisher, by accepting the article for publication, acknowledges that the United States Government retains a non-exclusive, paid-up, irrevocable, worldwide license to publish or reproduce the published form of this manuscript, or allow others to do so, for United States Government purposes. The Department of Energy will provide public access to these results of federally sponsored research in accordance with the DOE Public Access Plan (<http://energy.gov/downloads/doe-public-access-plan>).*

## Molecular Characterization

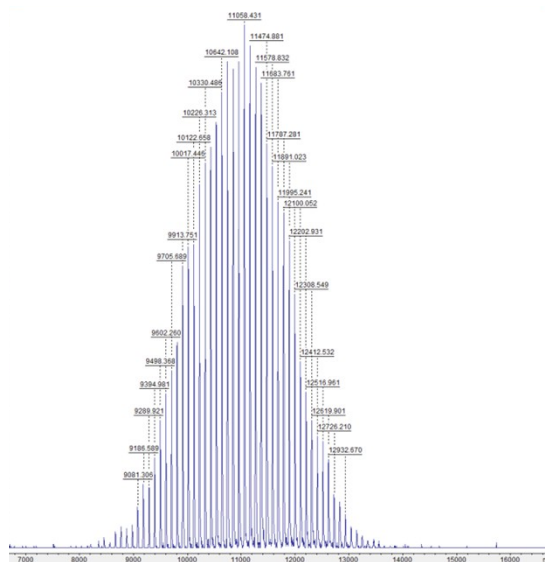

Figure S1: MALDI-TOF of PS macromonomer.

## Thermal Analysis

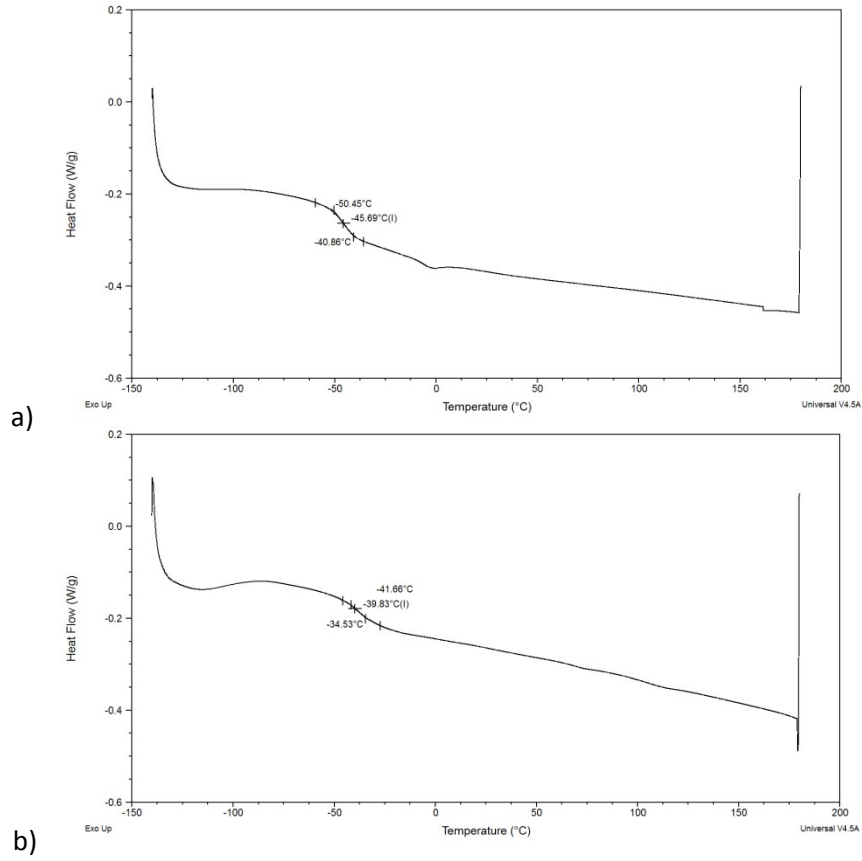

Figure S2: DSC for a) PSm-PnBA-1 and b) PSSm-PnBA-1 multigraft copolymers.

## Extentional Rheometry

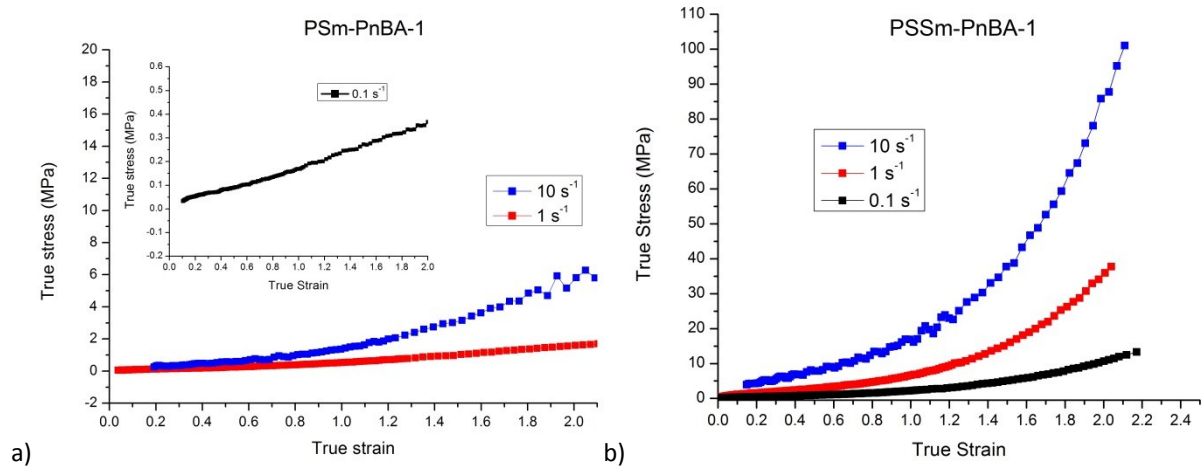

Figure S3: Non-linear viscoelastic data for a) PSm-PnBA-1 and b) PSSm-PnBA-1 for 0.1, 1 and 10 s<sup>-1</sup>.

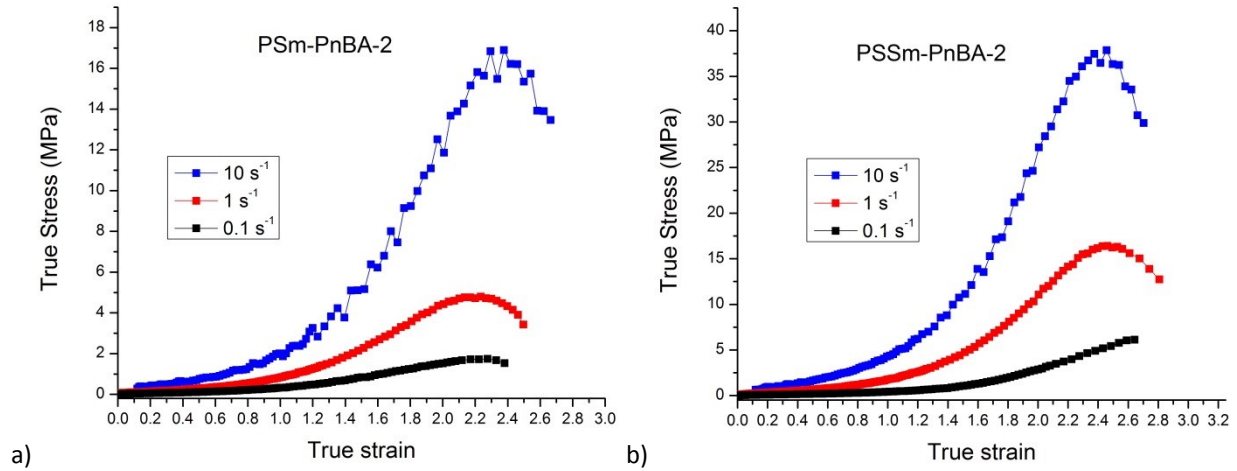

**Figure S4:** Non-linear viscoelastic data for a) PSm-PnBA-2 and b) PSSm-PnBA-2 for 0.1, 1 and 10 s<sup>-1</sup>.

True strain  $\epsilon$  is equal to Hencky strain  $\epsilon$  which can be related to the stretching ratio  $\lambda$  using the following equation:  $\epsilon = \ln \lambda$ . Consequently, stretching ratio will be:  $\lambda = e^\epsilon$  and for  $\epsilon = 3$  we get  $\lambda = 20.08$ , which means 2008% elongation (since  $\lambda = L/L_0$  with  $L$  = length of the specimen at break and  $L_0$  = initial length of the specimen) which is pretty close to our experimental value of 2060% for PSm-PnBA-1 (non-sulfonated) and strain rates 1 s<sup>-1</sup> and 10 s<sup>-1</sup>.

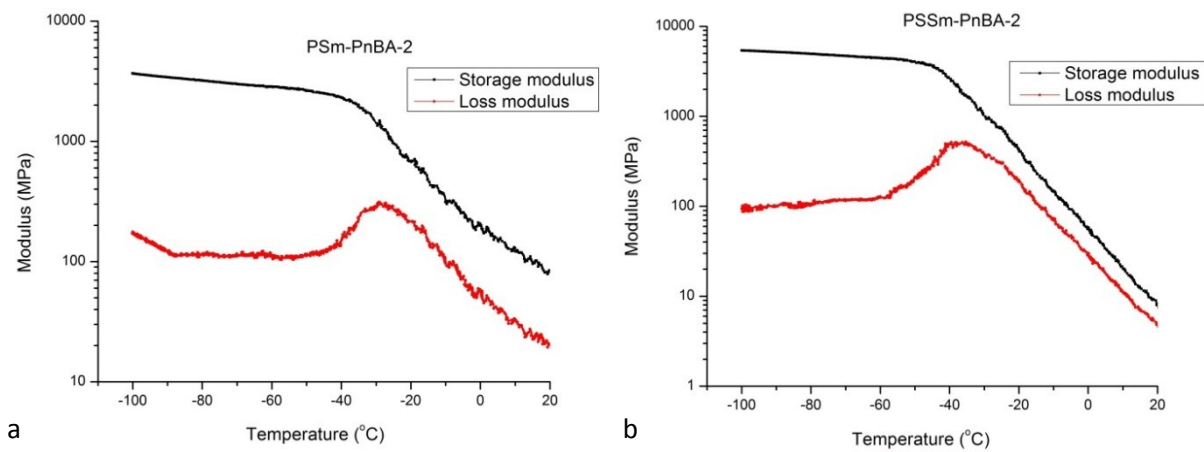

**Figure S5:** Storage and loss modulus of a) PSm-PnBA-2 and b) PSSm-PnBA-2 for -100 to 20°C.

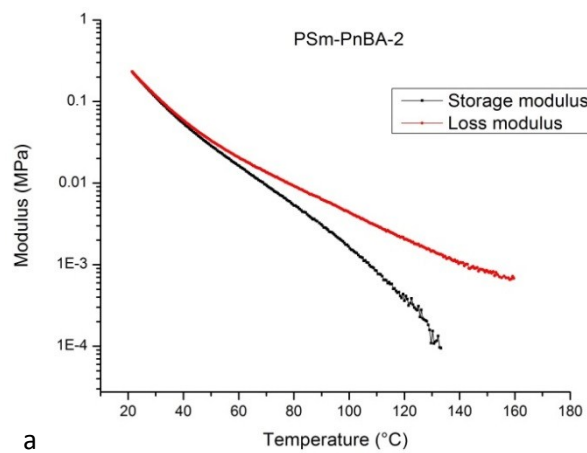

a

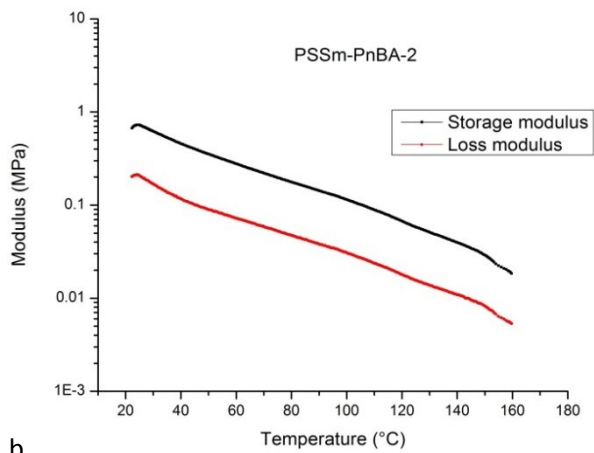

b

**Figure S6:** Storage and loss modulus of a) PSm-PnBA-2 and b) PSSm-PnBA-2 for 20 to 160°C.
